# Supplementary material
Source: PubMed Central journal article supplement (PMC3501750)

## Figure Legends

*Figure 1.* Percentage of drop-out after initial visit by calendar month among all UVA Children's Fitness Clinic (CFC) participants. Values shown reflect mean percentage of participant drop-outs and the bars represent 95% confidence intervals. CFC participants with an initial follow-up visit during the summer (defined as May-July) were more likely to drop-out ( $p < 0.05$ ).

*Figure 2.* Comparison of pre- and post-intervention mean change in BMI (A) and WC (B) stratified by age and gender. Bars represent 95% confidence intervals. \*  $p < 0.05$  for change from baseline.

*Figure 3.* Comparison of pre- and post-intervention mean change in Insulin (A), LDL (B), and Triglycerides (C) stratified by age and gender. Bars represent 95% confidence intervals.

Adolescent girls (ages 12-17y) were the only group with a significant change in either BMI (A) or WC (B). \*  $p < 0.05$  for change from baseline.

*Supplementary Figure 1.* UVA Health System Service Area Map represents geographic regions of Virginia served by the UVA Health System.

PSA = Primary Service Area.

SSA = Secondary Service Area.

Tertiary Service areas are shown in blue, purple, green, and brown.

Figure

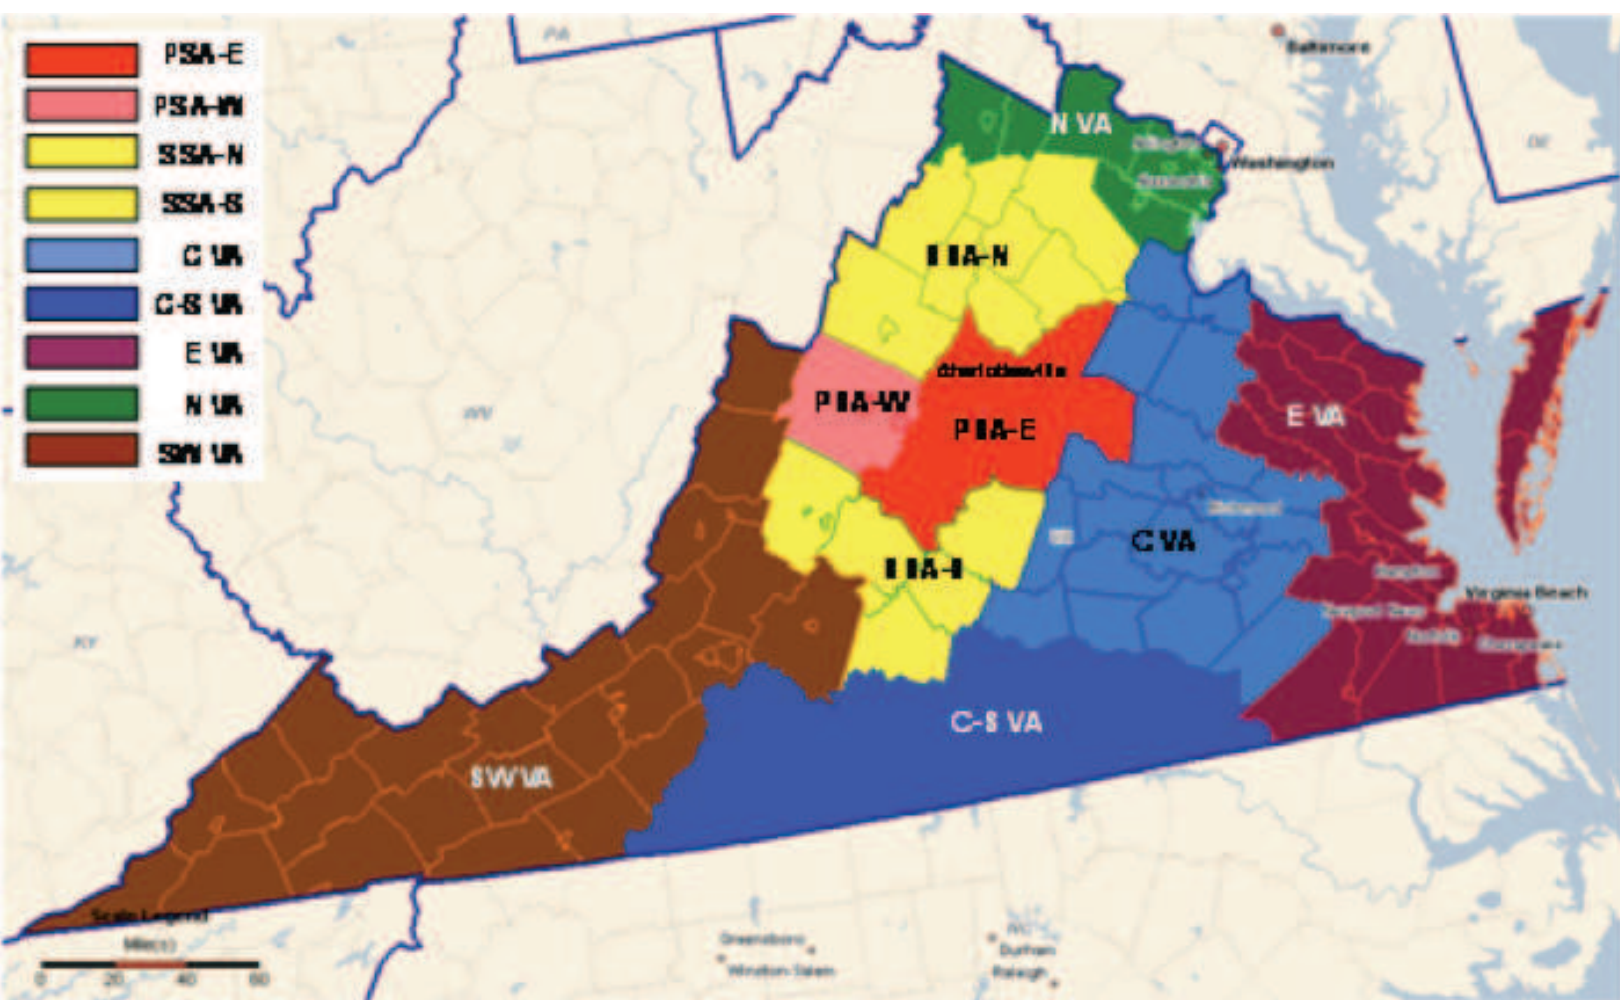

Supplement: NIHMS324849-supplement-2.pdf [file NIHMS324849-supplement-2.pdf]
