# Supplementary material
Source: PubMed Central journal article supplement (PMC3501750)

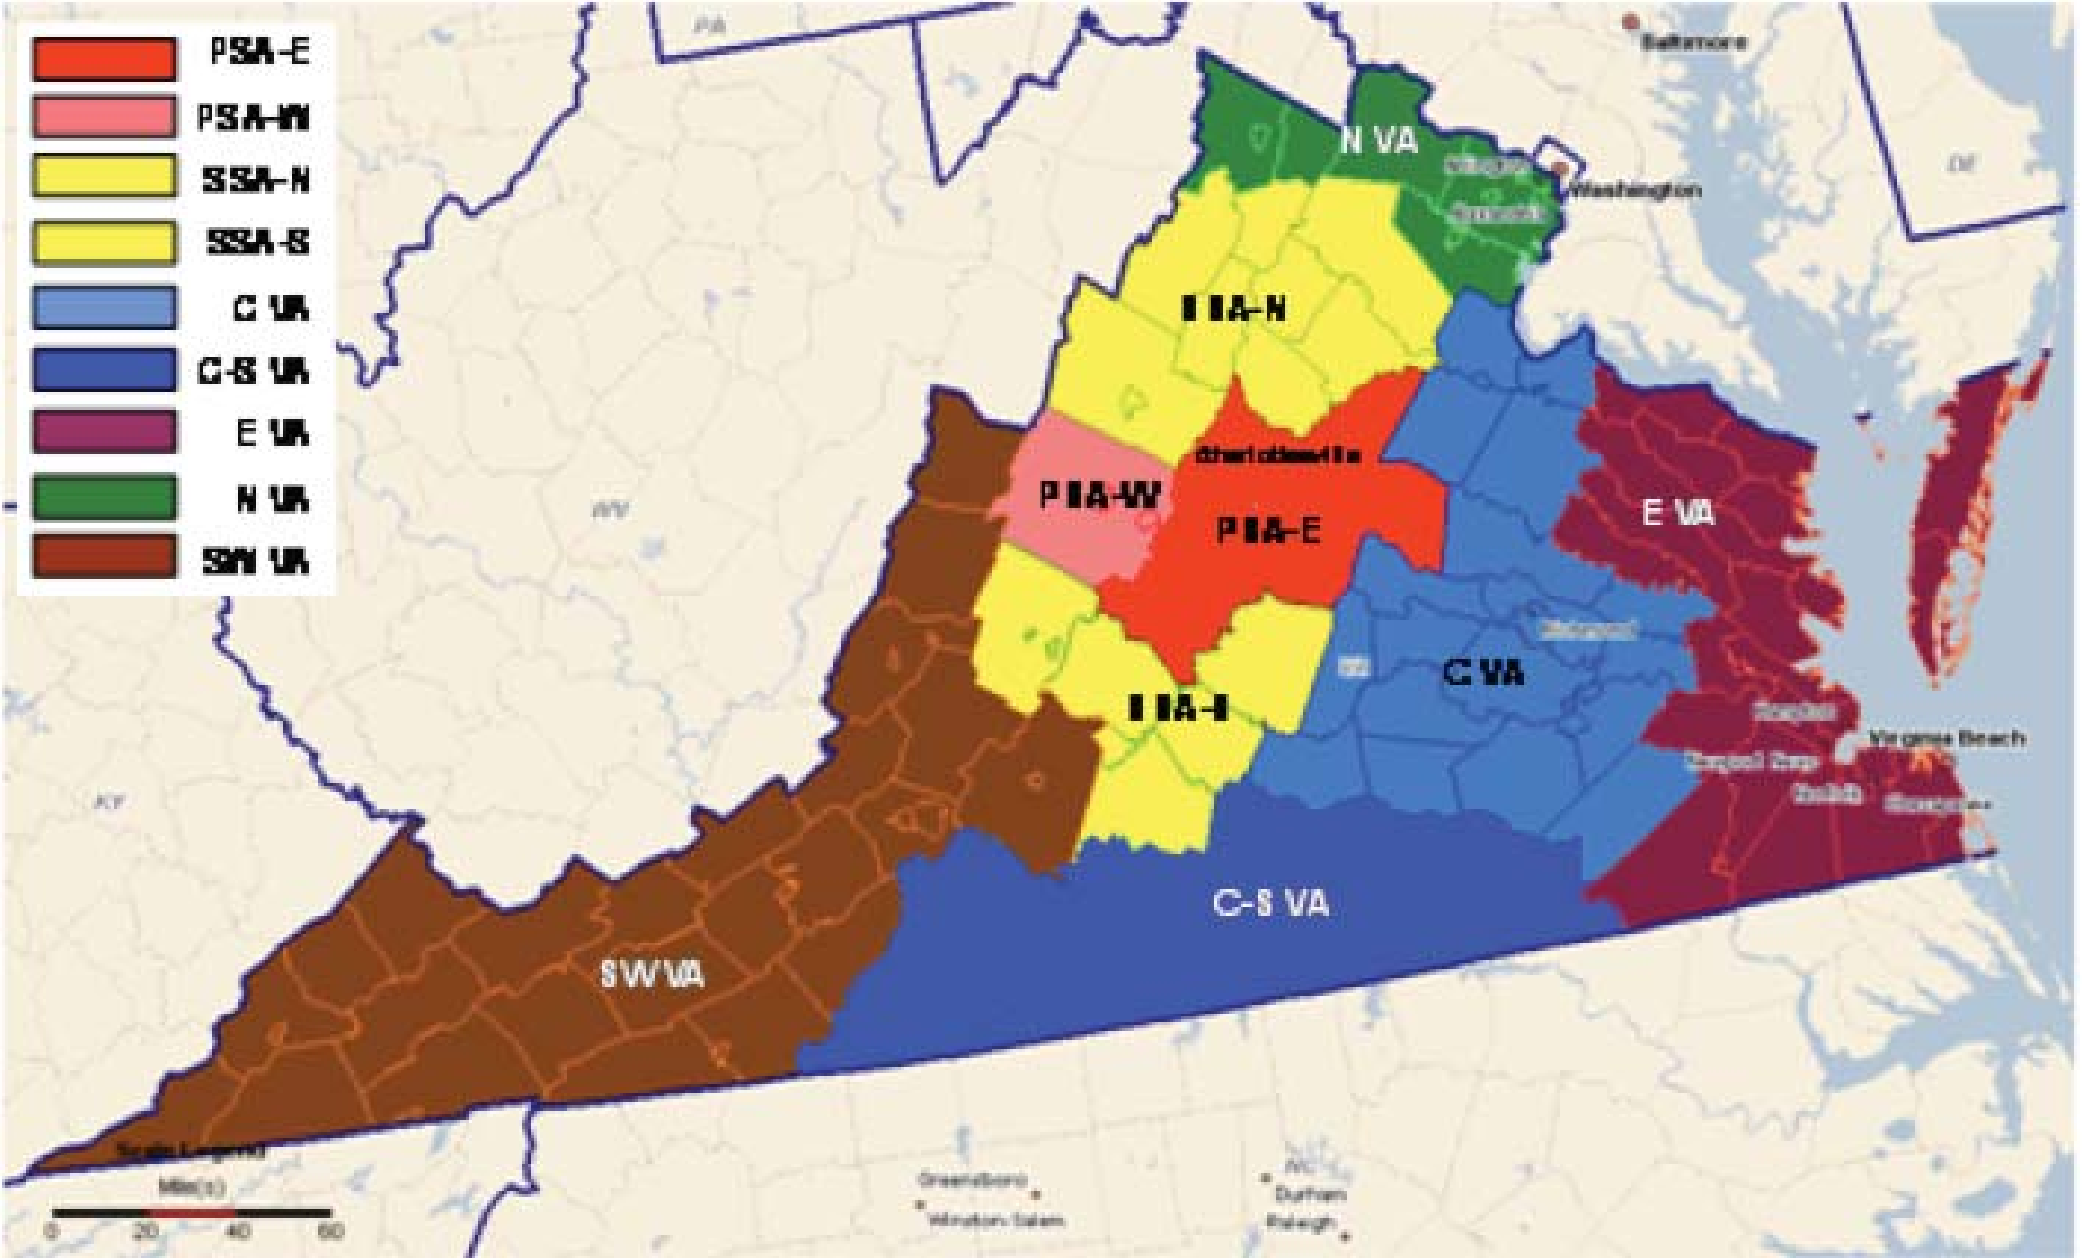

Supplement: NIHMS324849-supplement-01.pdf [file NIHMS324849-supplement-01.pdf]
